# Supplementary material for: Field-deployable, rapid diagnostic testing of saliva for SARS-CoV-2
Source: PubMed Central journal article supplement (PMC7943555; doi:10.1038/s41598-021-84792-8), 2021-03-09
Supplement: 41598_2021_84792_MOESM1_ESM.pdf [file 41598_2021_84792_MOESM1_ESM.pdf]

## Supplemental materials

### Field-deployable, rapid diagnostic testing of saliva for SARS-CoV-2

Shan Wei<sup>1\*</sup>, Hemant Suryawanshi<sup>1\*</sup>, Alexandre Djandji<sup>1</sup>, Esther Kohl<sup>1</sup>, Stephanie Morgan<sup>1</sup>, Eldad A. Hod<sup>1,2</sup>, Susan Whittier<sup>1,2</sup>, Kevin Roth<sup>1,2</sup>, Raymond Yeh<sup>1</sup>, Juan Carlos Alejaldre<sup>1,2</sup>, Elaine Fleck<sup>1,2</sup>, Stephen Ferrara<sup>1,2</sup>, Daniel Hercz<sup>3</sup>, David Andrews<sup>3</sup>, Lilly Lee<sup>3</sup>, Kristopher A. Hendershot<sup>3</sup>, Joshua Goldstein<sup>3</sup>, Yousin Suh<sup>1</sup>, Mahesh Mansukhani<sup>1,2</sup>, and Zev Williams<sup>1,2\*\*</sup>

<sup>1</sup> Columbia University Irving Medical Center, New York, NY, USA

<sup>2</sup> New York Presbyterian Hospital, New York, NY, USA

<sup>3</sup> Jackson Memorial Hospital, Miami, FL, USA

\* These authors contributed equally

\*\* Corresponding author

Email: [zw2421@cumc.columbia.edu](mailto:zw2421@cumc.columbia.edu)

**Table S1. Sequence information of primers tested in this study**

| <b>Primer set</b>       | <b>ID</b> | <b>Primer</b>                                      | <b>Reference</b> |
|-------------------------|-----------|----------------------------------------------------|------------------|
| <b>V1</b>               | V1.F3     | CTGTCTATCCAGTTGCGTCA                               | This study       |
|                         | V1.B3     | GAATTGTGACATGCTGGACAA                              |                  |
|                         | V1.FIP    | CTGCCATGAAGTTTCACCACAATGA-CCAAATGAATGCAACCAAATGTG  |                  |
|                         | V1.BIP    | CCACTTGCGAATTTTGTGGCAC-ACAACAGCATTTTGGGGTAAG       |                  |
|                         | V1.LF     | TCACACTTCATGAGAGTTGAAAGG                           |                  |
|                         | V1.LB     | TGAGAATTTGACTAAAGAAGGTGCC                          |                  |
| <b>V2</b>               | V2.F3     | CCAGCATGTCACAATTCAGAAG                             | This study       |
|                         | V2.B3     | GTATGGTTACAACCTATGTTAGCG                           |                  |
|                         | V2.FIP    | CCACCCTTACGAAGAATGGTTTTCA-TAGGACCTGAGCATAGTCTTG    |                  |
|                         | V2.BIP    | CGCACTATTGCCTTTGGAGGC-CTAGCACGTGGAACCCAAT          |                  |
|                         | V2.LF     | AGCCAGATTCATTATGGTATTCGG                           |                  |
|                         | V2.LB     | ATGTTGGTTGCCATAACAAGTGTG                           |                  |
| <b>V3</b>               | V3.F3     | TGAGGATGAAGAAGAAGGTGATTG                           | This study       |
|                         | V3.B3     | AGTTGTCTGATTGTCCTCACTG                             |                  |
|                         | V3.FIP    | GGCACCAAATTCCAAAGGTTTACCT-TGAAGAAGAAGAGTTTGAGCCATC |                  |
|                         | V3.BIP    | TCTGCTGCTCTTCAACCTGAAGAA-CCGTCTTGTTGACCAACAGT      |                  |
|                         | V3.LF     | GGTAATCATCTTCAGTACCATACTCAT                        |                  |
|                         | V3.LB     | GCAAGAAGAAGATTGGTTAGATGATG                         |                  |
| <b>V4</b>               | V4.F3     | TGCACTTATCTTAGCCTACTGTA                            | This study       |
|                         | V4.B3     | CACGTACAAGGTATCTGAACAC                             |                  |
|                         | V4.FIP    | CCACGTTCAAGACTCTTTTGCAAGA-GGTGAGTTAGGTGATGTTAGAGAA |                  |
|                         | V4.BIP    | TGTGTAAAACCTGTGGACAACAGCA-TTCATAAGAAAGTGTGCCCATG   |                  |
|                         | V4.LF     | TGGCATGTTGAAACAAGTAACTCAT                          |                  |
|                         | V4.LB     | CCCTTAAGGGTGTAGAAGCTGTT                            |                  |
| <b>V5<br/>(HP-LAMP)</b> | V5.F3     | TGGATACTACTAGCTACAGAGAAG                           | 15               |
|                         | V5.B3     | AGCCAAAGACCGTTAAGTGTA                              |                  |
|                         | V5.FIP    | GTGGTGGTTGGTAAAGAACATCAGA-CTTGTTGTCATCTCGCAAAGG    |                  |
|                         | V5.BIP    | CCTCTATCACCTCAGCTGTTTTGC-TGTACCATAACAACCTCAACTT    |                  |
|                         | V5.LF     | ACCTGAGTTACTGAAGTCATTGAGA                          |                  |

|                         |                         |                                                    |                       |
|-------------------------|-------------------------|----------------------------------------------------|-----------------------|
|                         | V5.LB                   | TGGTTTTAGAAAAATGGCATTCCC                           |                       |
| <b>V6</b>               | V6.F3                   | GGATGTAACTGCACAGAAGTC                              | This study            |
|                         | V6.B3                   | GCCGAGGAGAATTAGTCTGAG                              |                       |
|                         | V6.FIP                  | GCCTGCACGTGTTTTGAAAAACATTA-CCTGTTGCTATTCATGCAGATC  |                       |
|                         | V6.BIP                  | AATAGGGGCTGAACATGTCAACAAC-TCTGATAACTAGCGCATATACCTG |                       |
|                         | V6.LF                   | GAACCTGTAGAATAAACACGCCAAG                          |                       |
|                         | V6.LB                   | CATATGAGTGTGACATACCCATTGG                          |                       |
|                         | <b>V7</b>               | V7.F3                                              |                       |
| V7.B3                   |                         | TTGGAACGCCTTGTCTCCTC                               |                       |
| V7.FIP                  |                         | TTGTTTTGATCGCGCCCCAC-CCCTCAGATTCAACTGGCA           |                       |
| V7.BIP                  |                         | CGGCCCCAAGGTTTACCCAA-GGAATTTAAGGTCTTCCCTTGCC       |                       |
| V7.LF                   |                         | TGCGTTCTCCATTCTGGTTAC                              |                       |
| V7.LB-Lo                |                         | CTTGGTTCACCGCTCTCACTC                              |                       |
| <b>V8</b>               |                         | V8.F3                                              | TCACGTAGTCGCAACAGTT   |
|                         | V8.B3                   | GAAGCCTCAGCAGCAGAT                                 |                       |
|                         | V8.FIP                  | CAAAGCAAGAGCAGCATCACCG-GCAGCAGTAGGGGAACTT          |                       |
|                         | V8.BIP                  | CTGCTTGACAGATTGAACCAGCT-CTTAGTGACAGTTTGGCCTTG      |                       |
|                         | V8.LF                   | TGCCAGCCATTCTAGCAGGAG                              |                       |
|                         | V8.LB                   | TGAGAGCAAAATGTCTGGTAAAGG                           |                       |
|                         | <b>1a-A<br/>(NEB-1)</b> | ORF1a-A-F3                                         | CTGCACCTCATGGTCATGTT  |
| ORF1a-A-B3              |                         | AGCTCGTCGCCTAAGTCAA                                |                       |
| ORF1a-A-FIP             |                         | GAGGGACAAGGACACCAAGTGTATGGTTGAGCTGGTAGCAGA         |                       |
| ORF1a-A-BIP             |                         | CCAGTGGCTTACCGCAAGGTTTTAGATCGGCGCCGTAAC            |                       |
| ORF1a-A-LF              |                         | CCGTACTGAATGCCTTCGAGT                              |                       |
| ORF1a-A-LB              |                         | TTCGTAAGAACGGTAATAAAGGAGC                          |                       |
| <b>1a-B<br/>(NEB-2)</b> |                         | ORF1a-B-F3                                         | TCATCAAACGTTCCGGATGCT |
|                         | ORF1a-B-B3              | TATGGCCACCAGCTCCTT                                 |                       |
|                         | ORF1a-B-FIP             | CGACCGTACTGAATGCCTTCGAGAAGTGCACCTCATGGTCAT         |                       |
|                         | ORF1a-B-BIP             | AGACACTTGGTGTCTTGTCCCAGAAGAACCTTGCGGTAAGC          |                       |
|                         | ORF1a-B-LF              | CTGCTACCAGCTCAACCATAAC                             |                       |
|                         | ORF1a-B-LB              | TCATGTGGGCGAAATACCAGT                              |                       |
|                         | <b>1a-C</b>             | ORF1a-C-F3                                         | CTGCACCTCATGGTCATGTT  |

|                                       |                |                                           |    |
|---------------------------------------|----------------|-------------------------------------------|----|
| <b>(NEB-3)</b>                        | ORF1a-C-B3     | GATCAGTGCCAAGCTCGTC                       |    |
|                                       | ORF1a-C-FIP    | GAGGGACAAGGACACCAAGTGTGGTAGCAGAACTCGAAGGC |    |
|                                       | ORF1a-C-BIP    | CCAGTGGCTTACCGCAAGGTTTTAGATCGGCGCCGTAAC   |    |
|                                       | ORF1a-C-LF     | ACCACTACGACCGTACTGAAT                     |    |
|                                       | ORF1a-C-LB     | TTCGTAAGAACGGTAATAAAGGAGC                 |    |
| <b>N-A</b>                            | GeneN-A-F3     | TGGCTACTACCGAAGAGCT                       | 12 |
| <b>(NEB-4)</b>                        | GeneN-A-B3     | TGCAGCATTGTTAGCAGGAT                      |    |
|                                       | GeneN-A-FIP    | TCTGGCCCAGTTCCTAGGTAGTCCAGACGAATTCGTGGTGG |    |
|                                       | GeneN-A-BIP    | AGACGGCATCATATGGGTTGCACGGGTGCCAATGTGATCT  |    |
|                                       | GeneN-A-LF     | GGACTGAGATCTTTCATTTTACCGT                 |    |
|                                       | GeneN-A-LB     | ACTGAGGGAGCCTTGAATACA                     |    |
| <b>N-B</b>                            | GeneN-B-F3     | ACCGAAGAGCTACCAGACG                       | 12 |
| <b>(NEB-5)</b>                        | GeneN-B-B3     | TGCAGCATTGTTAGCAGGAT                      |    |
|                                       | GeneN-B-FIP    | TCTGGCCCAGTTCCTAGGTAGTTCGTGGTGGTGACGGTAA  |    |
|                                       | GeneN-B-BIP    | AGACGGCATCATATGGGTTGCACGGGTGCCAATGTGATCT  |    |
|                                       | GeneN-B-LF     | CCATCTTGGACTGAGATCTTTCATT                 |    |
|                                       | GeneN-B-LB     | ACTGAGGGAGCCTTGAATACA                     |    |
| <b>2019-<br/>nCoV_N1<br/>(CDC-N1)</b> | 2019-nCoV_N1-F | GACCCCAAATCAGCGAAAT                       | 27 |
|                                       | 2019-nCoV_N1-R | TCTGGTACTGCCAGTTGAATCTG                   |    |
| <b>2019-<br/>nCoV_N2<br/>(CDC-N2)</b> | 2019-nCoV_N2-F | TTACAAACATTGGCCGCAA                       | 27 |
|                                       | 2019-nCoV_N2-R | GCGCGACATTCCGAAGAA                        |    |

FIP: forward inner primer; BIP: backward inner primer; LF: loop forward; LB: loop backward.

**Table S2. in silico Inclusivity analysis**

| <b>Characteristics</b>              | <b>CUFC-primers<br/>(Orflab gene)</b> |
|-------------------------------------|---------------------------------------|
| <b>Total primer length (nt)</b>     | 186                                   |
| <b>Total # of Strains Evaluated</b> | 16453                                 |
| <b>100% Match*</b>                  | 16264                                 |
| <b>1 Mismatch*</b>                  | 182                                   |
| <b>2 Mismatches*</b>                | 7                                     |
| <b>3 Mismatches</b>                 | 0                                     |
| <b>&gt;3 Mismatches</b>             | 0                                     |

\*Some isolate genome sequences contain degenerate bases in the region of primers. Currently, if the degenerate base match appears in the middle of a primer, and the degenerate base include the base present on the primer according to the IUPAC degenerate nucleotide codes (e.g., R=A or G, the isolate genome sequence has R and the primer has A), it's counted as match (18 isolates in the 100% match category). If the degenerate base match appears at the 3' end of a primer (which in general has greater impact on amplification efficiency), and the degenerate base includes the base present on the primer according to the IUPAC degenerate nucleotide codes, it's counted as a mismatch in this table. Degenerate bases match in the middle of 2 primers are counted as mismatch (2 isolates in the 2 mismatches category).

**Table S3. Cross-reactivity in silico analysis**

| Pathogen                                                           | F3       | B3       | FIP part 1 | FIP part 2 | BIP part 1 | BIP part 2 | LF       | LB       |
|--------------------------------------------------------------------|----------|----------|------------|------------|------------|------------|----------|----------|
| Human adenovirus C                                                 | no match | no match | no match   | no match   | no match   | no match   | no match | no match |
| Human metapneumovirus isolate 00-1                                 | no match | no match | no match   | no match   | no match   | no match   | no match | no match |
| Human parainfluenza virus HPIV-1 strain Washington/1964            | no match | no match | no match   | no match   | no match   | no match   | no match | no match |
| Human parainfluenza virus 4a                                       | no match | no match | no match   | no match   | no match   | no match   | no match | no match |
| Human parainfluenza virus 4a strain HPIV4a/Seattle/USA/SC9971/2018 | no match | no match | no match   | no match   | no match   | no match   | no match | no match |
| Human parainfluenza virus 4b strain HPIV4b/Seattle/USA/SC0496/2019 | no match | no match | no match   | no match   | no match   | no match   | no match | no match |
| Human parainfluenza virus 2 strain G REER                          | no match | no match | no match   | no match   | no match   | no match   | no match | no match |
| Human parainfluenza virus 3                                        | no match | no match | no match   | no match   | no match   | no match   | no match | no match |
| Human enterovirus 68 strain Fermon                                 | no match | no match | no match   | no match   | no match   | no match   | no match | no match |
| Influenza A virus (A/California/07/2009(H1N1))                     | no match | no match | no match   | no match   | no match   | no match   | no match | no match |
| Influenza B virus (B/Lee/1940)                                     | no match | no match | no match   | no match   | no match   | no match   | no match | no match |
| Respiratory syncytial virus                                        | no match | no match | no match   | no match   | no match   | no match   | no match | no match |
| Human rhinovirus A1                                                | no match | no match | no match   | no match   | no match   | no match   | no match | no match |
| <i>Chlamydia pneumoniae</i> TW-183 (chlamydias)                    | no match | no match | no match   | no match   | no match   | no match   | no match | no match |
| <i>Haemophilus influenzae</i> ASM76707v1                           | no match | no match | no match   | no match   | no match   | no match   | no match | no match |
| <i>Legionella pneumophila</i> ASM194158v1                          | no match | no match | no match   | no match   | no match   | no match   | no match | no match |
| <i>Mycobacterium tuberculosis</i> H37Rv (high GC Gram+)            | no match | no match | no match   | no match   | no match   | no match   | no match | no match |
| <i>Streptococcus pneumoniae</i> R6                                 | no match | no match | no match   | no match   | no match   | no match   | no match | no match |
| <i>Streptococcus pyogenes</i> M1 GAS                               | no match | no match | no match   | no match   | no match   | no match   | no match | no match |
| <i>Bordetella pertussis</i> 18323                                  | no match | no match | no match   | no match   | no match   | no match   | no match | no match |
| <i>Mycoplasma pneumoniae</i> M129                                  | no match | no match | no match   | no match   | no match   | no match   | no match | no match |
| <i>Candida albicans</i> SC5314                                     | no match | no match | no match   | no match   | no match   | no match   | no match | 66.70%   |
| <i>Pseudomonas aeruginosa</i> PAO1                                 | no match | no match | no match   | no match   | 66.70%     | no match   | no match | no match |
| <i>Pneumocystis jirovecii</i> (ascomycetes)                        | no match | no match | no match   | no match   | no match   | no match   | no match | no match |
| <i>Staphylococcus epidermidis</i> ATCC 12228                       | no match | no match | no match   | no match   | no match   | no match   | no match | no match |
| <i>Streptococcus salivarius</i> ASM78551v1                         | no match | no match | no match   | no match   | no match   | no match   | no match | no match |
| Human coronavirus 229E                                             | no match | no match | no match   | no match   | no match   | no match   | no match | no match |
| Human coronavirus OC43 strain ATCC VR-759                          | no match | no match | no match   | no match   | no match   | no match   | no match | no match |
| Human coronavirus HKU1                                             | no match | no match | no match   | no match   | no match   | no match   | no match | no match |
| Human coronavirus NL63                                             | no match | no match | no match   | no match   | no match   | no match   | no match | no match |
| MERS-coronavirus                                                   | no match | no match | 83.30%     | no match   | no match   | no match   | no match | no match |
| SARS-coronavirus                                                   | no match | no match | 92.00%     | no match   | no match   | no match   | no match | 95.80%   |
| SARS-CoV-2                                                         | 100%     | 100%     | 100%       | 100%       | 100%       | 100%       | 100%     | 100%     |

**Table S4. Cross-activity wet lab testing**

| <b>Organism/Strain</b>          | <b>ZMC Panel Specs (Ct)</b> | <b>HP-LAMP+ Testing result</b> |
|---------------------------------|-----------------------------|--------------------------------|
| Influenza A H3N2                | 25-28                       | Neg                            |
| Influenza A H1N1                | 22-25                       | Neg                            |
| Influenza A 2009 H1N1           | 22-25                       | Neg                            |
| Influenza B                     | 21-24                       | Neg                            |
| Metapneumovirus 8               | 26-29                       | Neg                            |
| RSV A Stock                     | 26-29                       | Neg                            |
| Parainfluenza 1                 | 25-28                       | Neg                            |
| Parainfluenza 2                 | 27-30                       | Neg                            |
| Parainfluenza 3                 | 27-30                       | Neg                            |
| Parainfluenza 4                 | 22-25                       | Neg                            |
| Rhinovirus 1A                   | 25-28                       | Neg                            |
| Adenovirus 3                    | 22-25                       | Neg                            |
| Coronavirus OC43                | 25-28                       | Neg                            |
| Coronavirus 229E                | 25-28                       | Neg                            |
| Coronavirus NL63                | 25-28                       | Neg                            |
| Coronavirus HKU-1               | 22-25                       | Neg                            |
| <i>Bordetella pertussis</i>     | 22-25                       | Neg                            |
| <i>Chlamydophila pneumoniae</i> | 25-28                       | Neg                            |
| <i>Mycoplasma pneumoniae</i>    | 22-25                       | Neg                            |
| MERS-CoV                        | 25-28                       | Neg                            |
| SARS-CoV                        | 25-28                       | Neg                            |
| Negative                        | N/A                         | Neg                            |
| SARS-CoV-2                      | 27.5-29.5                   | Pos                            |

ZMC: ZeptoMetrix Corporation.

**Table S5. Target N2 Ct value of swab positive samples**

| <b>Platform</b> | <b>Ct (target N2 or N)</b> |
|-----------------|----------------------------|
| CEPHEID         | 16.4                       |
| CEPHEID         | 19.2                       |
| CEPHEID         | 21.0                       |
| CEPHEID         | 23.9                       |
| CEPHEID         | 24.3                       |
| CEPHEID         | 26.7                       |
| CEPHEID         | 26.7                       |
| CEPHEID         | 30.5                       |
| CEPHEID         | 31.4                       |
| CEPHEID         | 34.3                       |
| CEPHEID         | 40.1                       |
| CEPHEID         | 41.6                       |
| CEPHEID         | 41.6                       |
| GeneFinder      | 16.33                      |
| GeneFinder      | 18.87                      |
| GeneFinder      | 24.31                      |
| GeneFinder      | 24.54                      |
| GeneFinder      | 28.38                      |
| GeneFinder      | 30.01                      |
| QIAGEN          | 14.2                       |
| QIAGEN          | 17.72                      |
| QIAGEN          | 24.64                      |
| QIAGEN          | 29.71                      |
| QIAGEN          | 30.89                      |
| QIAGEN          | 32.79                      |
| QIAGEN          | 33.16                      |



## Supplementary Figure Legends

### Figure S1. Development of HP-LAMP.

(Colorimetric results: yellow=positive; red=negative; intermediate=negative)

**A) Genome map showing targeted region of primers.** Primers from previous publication are indicated in red (1a-A, 1a-B, 1a-C, N-A, N-B). In-house designed primer sets are indicated in green (V1-8). The targeted region of primer set V5 with alignments of other Betacoronavirus genomes are featured<sup>27,36</sup>. Each nucleic acid is shown (A: green; G: gray; T: red; C: blue). The percentage of GC-content across the genome is indicated<sup>28,37</sup>. The middle panel shows screening primer sets for SARS-CoV-2 testing. Those primer sets with sensitivities of 500 copies or fewer of SARS-CoV-2 are shown. A negative control and between 0.5 – 500 copies of SARS-CoV-2 RNA were spiked into 25  $\mu$ L reaction volume and assayed using RT-LAMP with previously reported primer sets (1a-A, N-A, N-B) and in-house designed primer sets (V3, V5 (ultimately the HP-LAMP primer), V7, V8). Color blocks reflect the actual color captured from a 96-well PCR plate. The right panel shows comparison of standard RT-LAMP and HP-LAMP sensitivity. Contrived saliva samples containing 0.25-200 copies of SARS-CoV-2 viral RNA per  $\mu$ L of saliva, along with a negative control, were tested using the V5 primer set with RT-LAMP and HP-LAMP. While RT-LAMP failed to detect viral RNA at levels as high as 200 copies/ $\mu$ L of saliva, HP-LAMP consistently detected levels as low as  $\sim$ 1 copy/ $\mu$ L of saliva, and often less. Color blocks represent the actual colorimetric results.

**B) Carrier DNA increase RT-LAMP specificity in large reaction volume.** Large reaction volume led to longer time to reach amplification plateau and higher chances of non-template amplification. V5 primer set rapidly detected the presence of 5 copies/ $\mu$ L SARS-CoV-2 RNA in 30min in large volume, and the presence of carrier DNA helped to maintain specificity in 45min incubation. N-A primer and a multiplex of N-A primer and V5 primer failed to detect viral target in 30min, and hence required extended incubation to 45min. At 45min, the negative control with 0.3ng/ $\mu$ L carrier DNA remained true negative.

**C) Effects of RNase inhibitor on RT-LAMP.** RNAase inhibitor (RI; 0 to 50% sample volume) was added to a RT-LAMP reaction. LAMP tolerated the presence of up to 25% volume of sample without a decrease in detection sensitivity and specificity. An addition of 10% RNase inhibitor showed comparable detection sensitivity and specificity to no RNase inhibitor added.

**D) Effects of 10% RNase inhibitor supplement on RT-LAMP in large reaction volumes.** LAMP can directly detect 1 to 0.125 SARS-CoV-2 RNA copies/ $\mu$ L saliva with the presence of 10% volume RI in assay (i.e., 2 $\mu$ L RNase inhibitor for 20 $\mu$ L saliva).

**E) Effect of carrier RNA on RT-LAMP.** 0.00009 to 9 ng/ $\mu$ L carrier RNA was added to each reaction. 9 ng/ $\mu$ L carrier RNA showed the highest detection sensitivity.

**F) Effect of carrier RNA on RT-LAMP in large reaction volume.** Supplement of  $\sim$ 9 ng/ $\mu$ L carrier RNA in HP-LAMP resulted in detection of 0.25 SARS-CoV-2 RNA copies/ $\mu$ L saliva directly.

**G) HP-LAMP detection of SARS-CoV-2 RNA in viral transport medium (VTM).** HP-LAMP detected 5 to 0.5 viral copies/ $\mu\text{L}$  VTM. Saliva is more inhibitory to RT-LAMP reaction than VTM, hence the HP-LAMP assay is efficient to alleviate inhibitory effects of VTM and detect SARS-CoV-2 directly.

**H) Effect of buffer TE and reduced sample volume.** Addition of  $15\mu\text{L}$  buffer TE and reduction of saliva input from  $20\mu\text{L}$  to  $5\mu\text{L}$  reduced the chance of false positive on clinical samples.

**I) Detection sensitivity is maintained with  $5\mu\text{L}$  saliva input.** The detection sensitivity using  $5\mu\text{L}$  is within  $10^0$  copies/ $\mu\text{L}$  saliva. The positive detection by colorimetric results were present after 26min-30min incubation at  $63^\circ\text{C}$ .

**J) Detection sensitivity and specificity improved with 5min heat-inactivation.** Clinical saliva samples vary widely and are impacted by many factors including the presence of food particles, overall health, body chemistry, blood and hydration. Some samples initially showed false negative results even with high viral load in saliva; some negative samples showed unexplained false positive or intermediate results.  $95^\circ\text{C}$  5min heat-inactivation eliminated the background effects and corrected 3 false negative or inconclusive clinical saliva samples into true positive and true negative. Heat inactivation also enhanced the biosafety of the test. It was incorporated in standard HP-LAMP assay for clinical validation.

### **Figure S2. Determining Limit of Detection (LoD) of HP-LAMP assay.**

**A) Scheme of performing 2-fold serial serial dilution.**

**B). Preliminary LoD.** The preliminary range of LoD was determined by testing the following 2-fold dilution series: 88.5, 44.2, 22, 11, 5.5, 2.75, 1.38, and 0.69 copies/ $\mu\text{L}$  of saliva. The dilutions of 5.5, 2.75, 1.38, and 0.69 copies/ $\mu\text{L}$  were then tested in triplicate to determine ‘preliminary LoD’.

**C). Confirming the LoD.** At 2.75 copies/ $\mu\text{L}$ , 20/20 samples were detected by HP-LAMP. At the LoD of 1.38 copies/ $\mu\text{L}$ , 19/20 samples (or approximately 95% of all true positive replicates) were positively detected.

### **Figure S3. Cross-reactivity of HP-LAMP assay on common pathogens.**

Inactivated known respiratory pathogens ( $n=21$ ) along with inactivated SARS-CoV-2 virus were tested using HP-LAMP assay. All pathogens showed negative detection results in HP-LAMP assay, except for SARS-CoV-2 virus.

### **Figure S4. HP-LAMP testing results on clinical saliva samples.**

Blinded clinical samples ( $n=65$ ) were subjected to HP-LAMP assay, and the testing results were compared with paired RT-PCR results from nasopharyngeal swabs.

**Figure S5. Interpretation of HP-LAMP colorimetric results.** Yellow: positive; Red: negative; orange: negative. HP-LAMP is tested in duplicate, at least 1/2 tube turning yellow is considered as a positive signal.

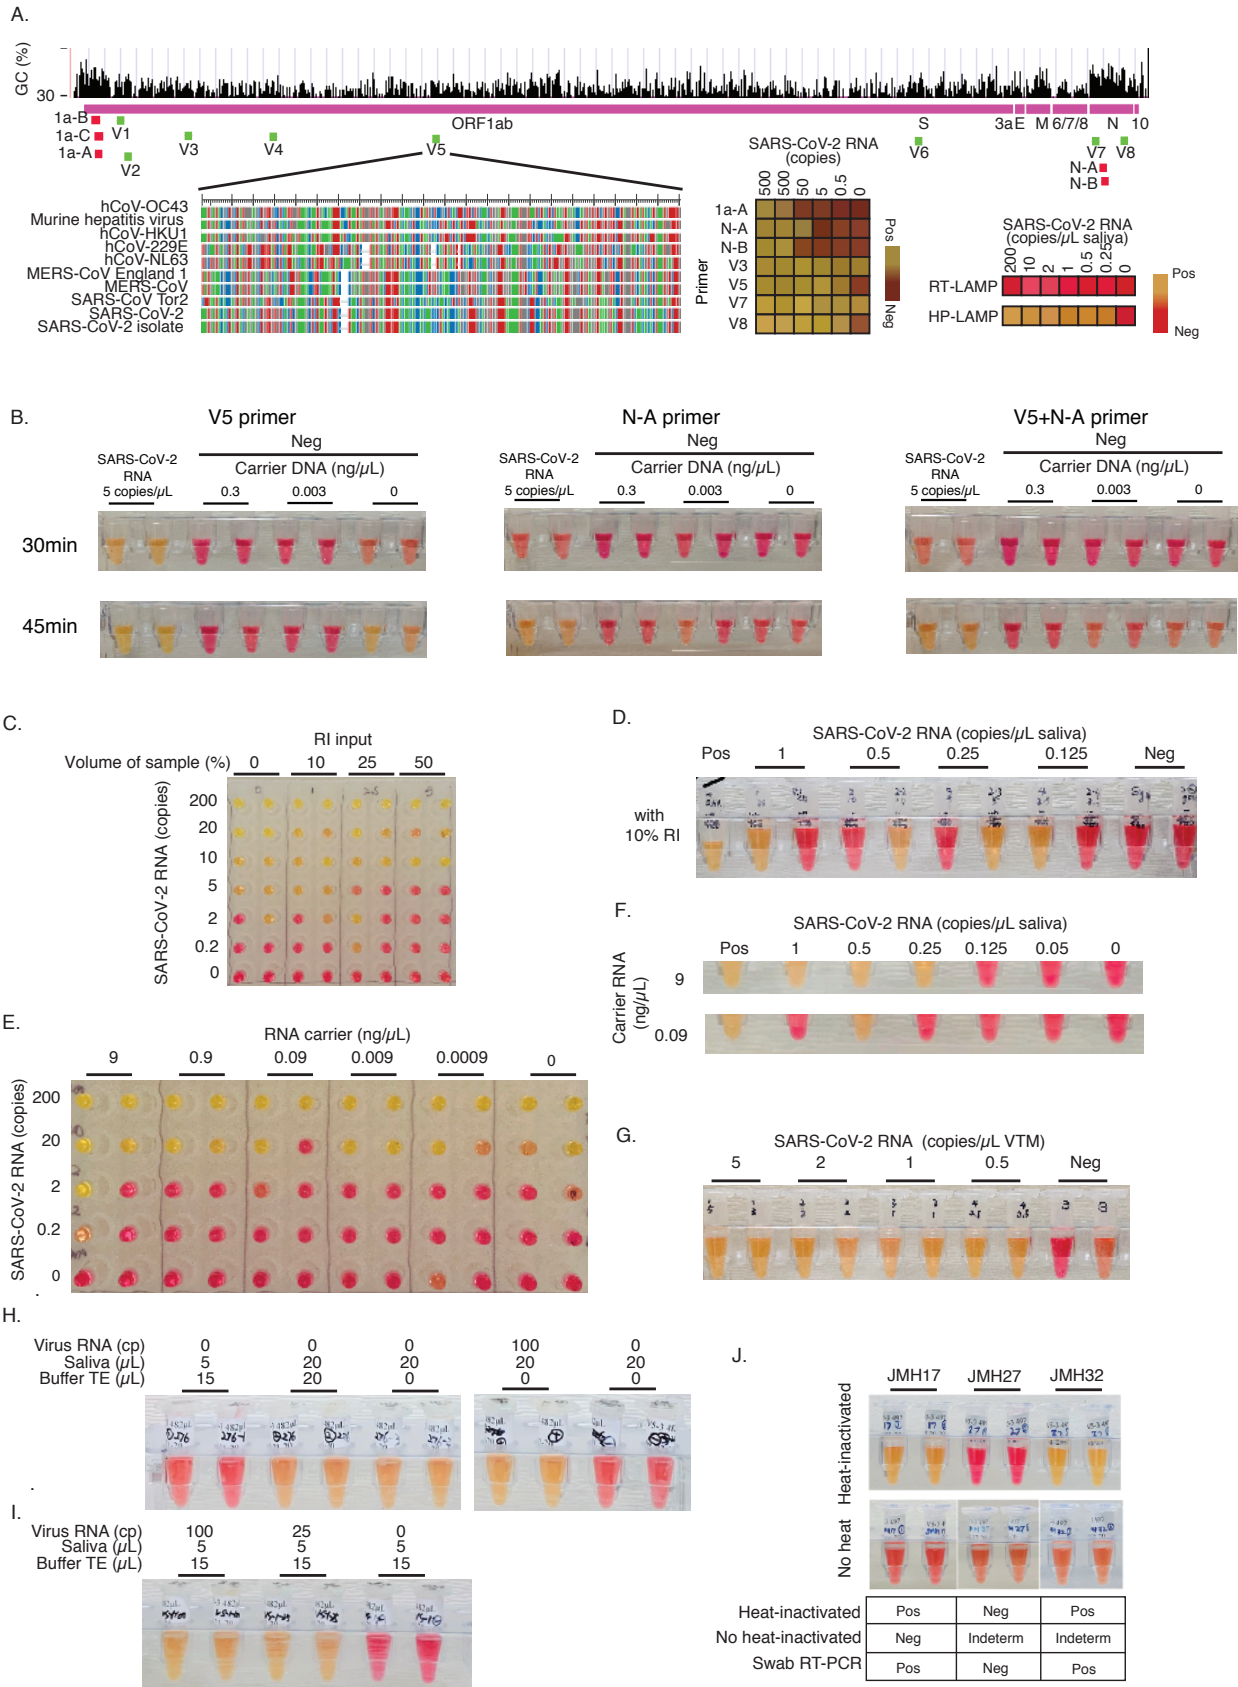

Fig. S1

10  $\mu$ l heat-inactivated virus  
( $1.77 \times 10^8$  copies/ $\mu$ l)

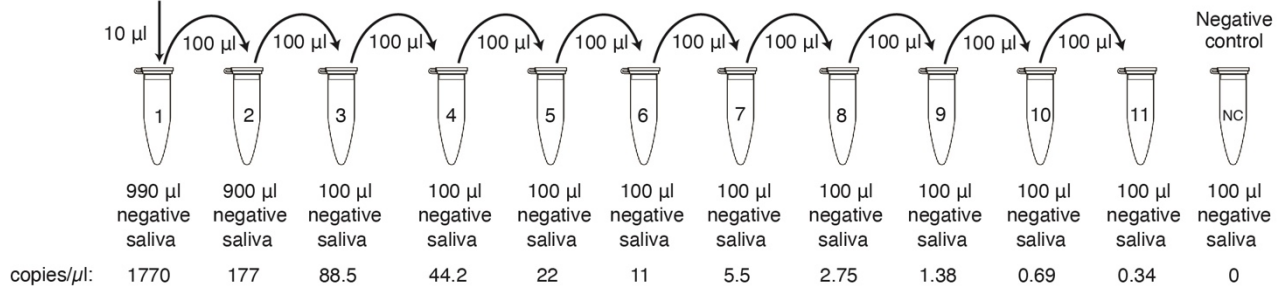

**Preliminary LoD**

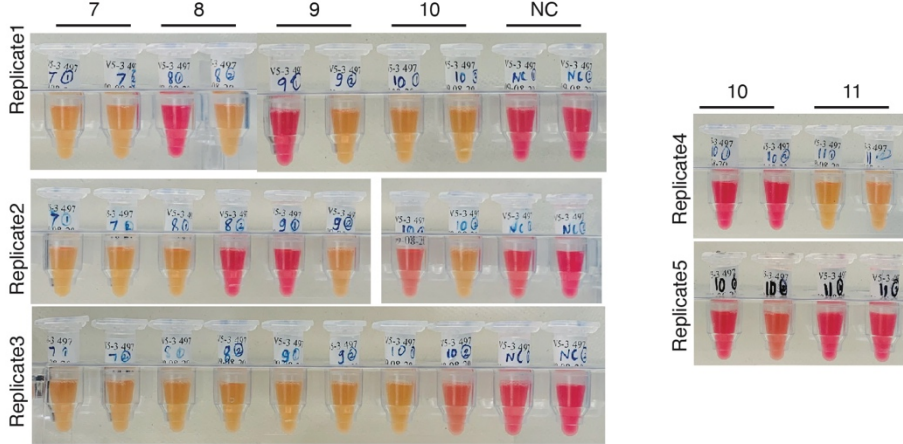

**LoD (Dilution 8)**

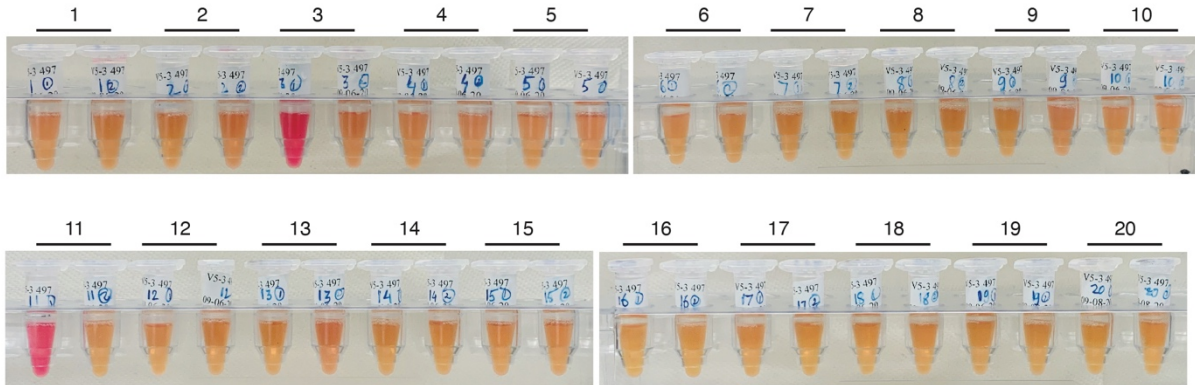

**Result: 20/20 positive**

**LoD (Dilution 9)**

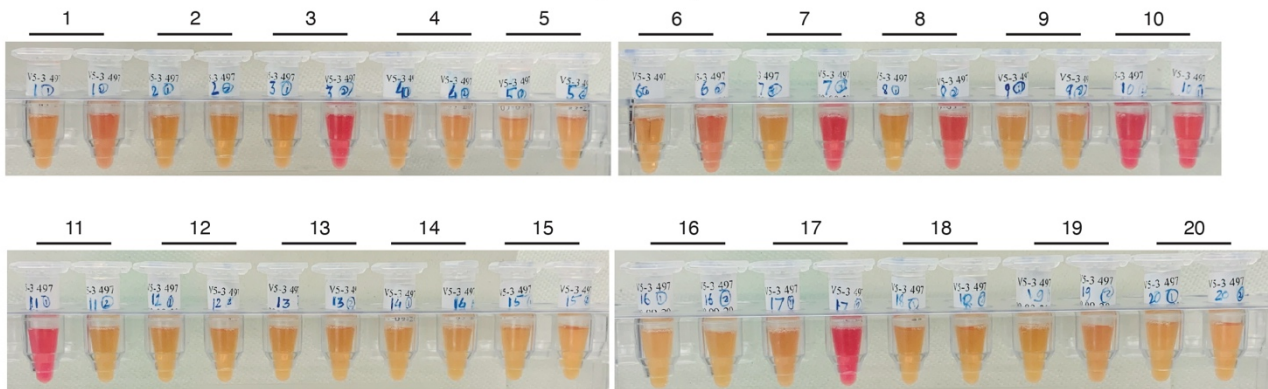

**Result: 19/20 positive**

Fig S2

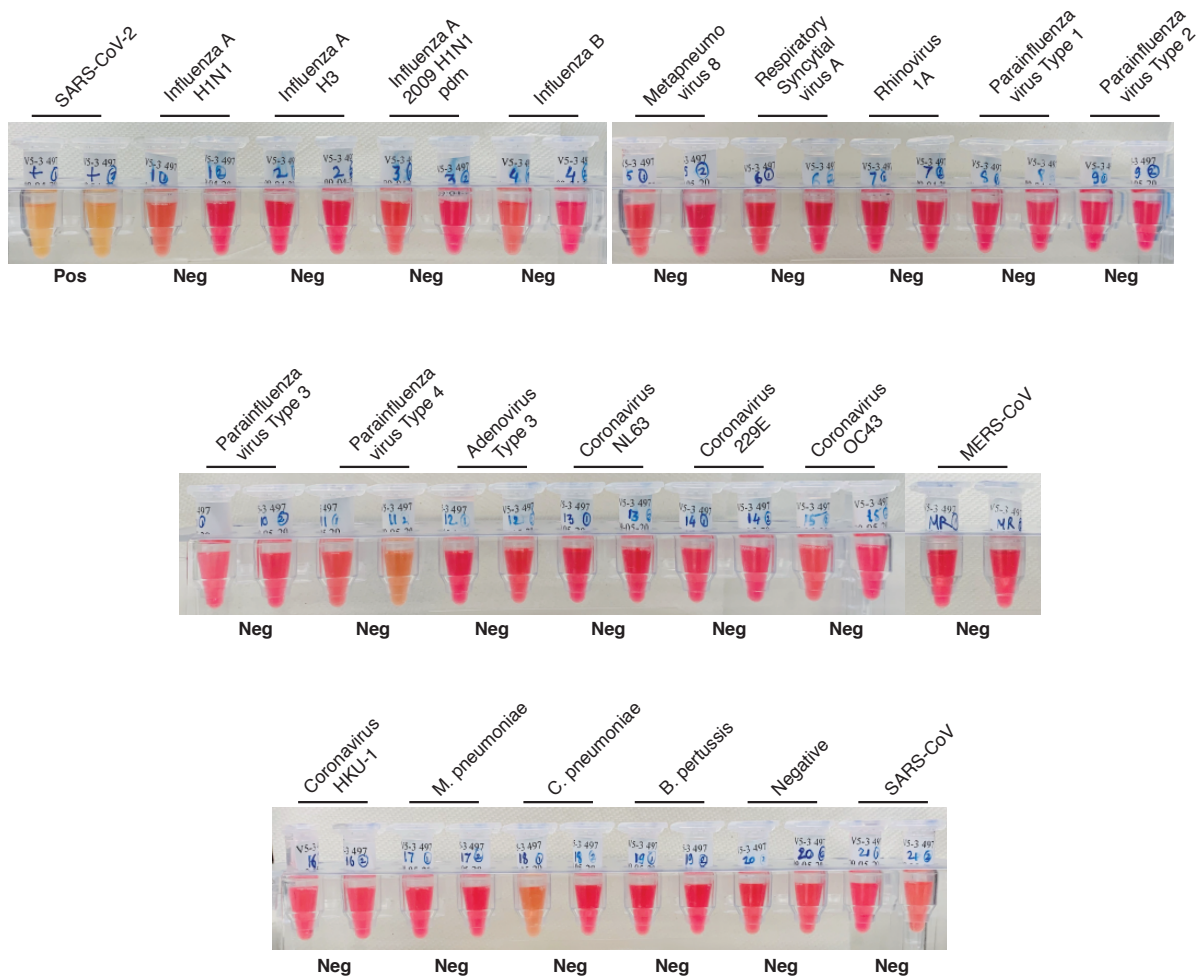

**Figure S3. Cross-reactivity of HP-LAMP assay on common pathogens.**

Inactivated known respiratory pathogens (n=21) along with inactivated SARS-CoV-2 virus were tested using HP-LAMP assay. All pathogens showed negative detection results in HP-LAMP assay, except for SARS-CoV-2 virus.

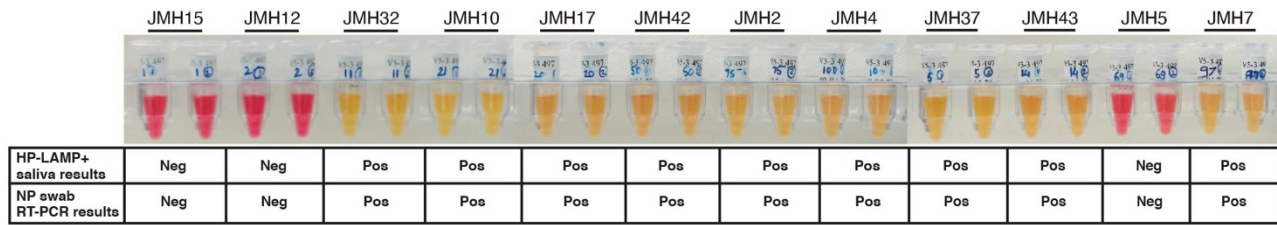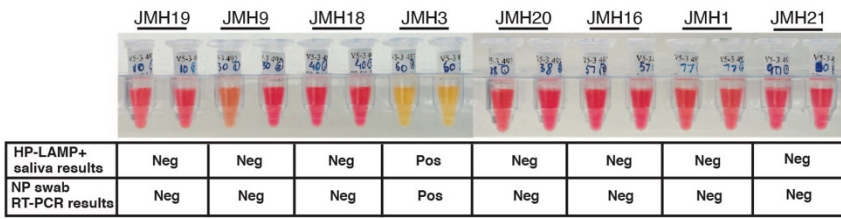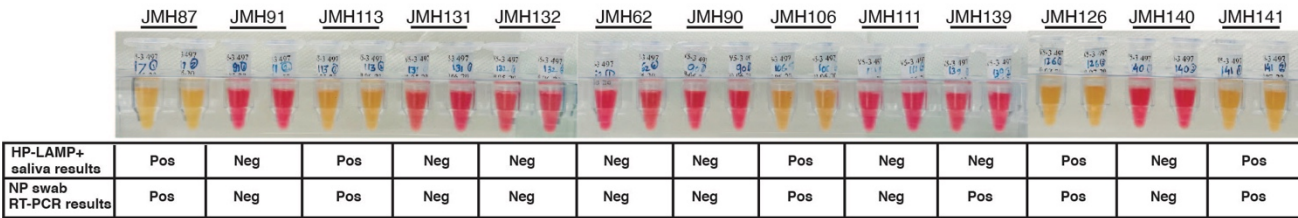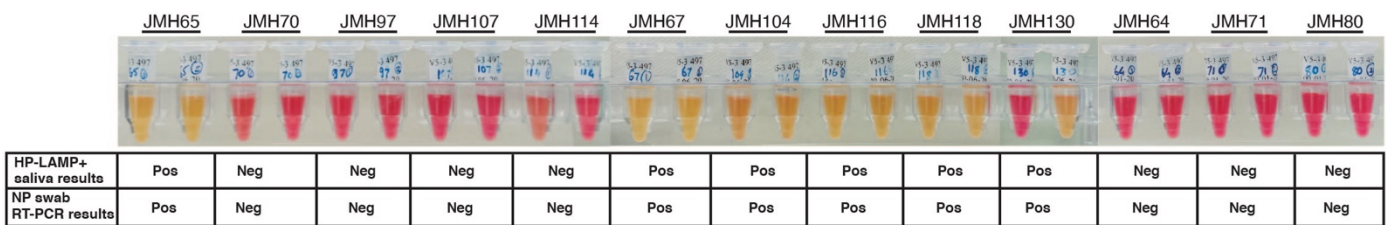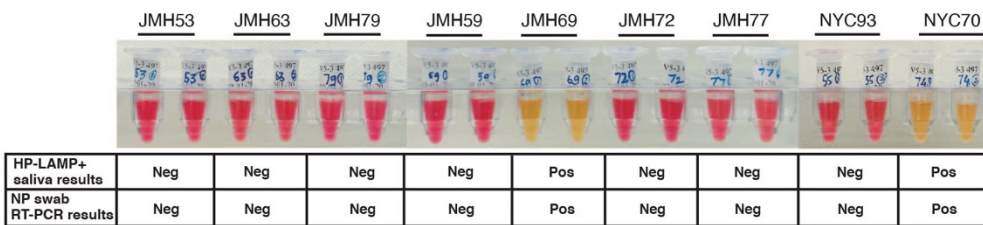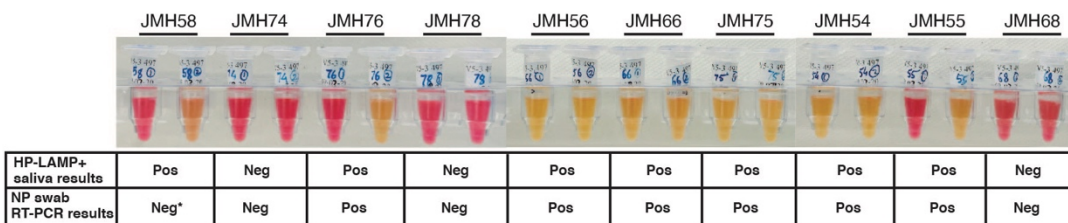

**Figure S4. HP-LAMP testing results on clinical saliva samples.**

Blinded clinical samples (n=65) were subjected to HP-LAMP assay, and the testing results were compared with paired RT-PCR results from nasopharyngeal swabs.

A.

HP-LAMP results interpretations

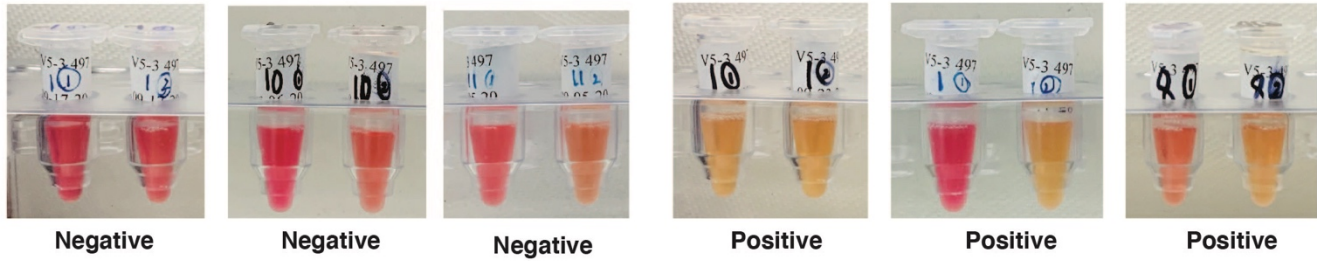

B.

| Color                                                                                           | Interpretation  |
|-------------------------------------------------------------------------------------------------|-----------------|
|  Yellow/Yellow | Positive signal |
|  Red/Red       | Negative signal |
|  Yellow/Red    | Positive signal |
|  Yellow/Orange | Positive signal |
|  Red/Orange    | Negative signal |
|  Orange/Orange | Negative signal |

**Figure S5. Interpretation of HP-LAMP colorimetric results. A) Representative HP-LAMP colorimetric Results.** Yellow: positive; Red: negative; orange: negative. HP-LAMP is tested in duplicate, at least 1 out of 2 tubes turned yellow is considered as a positive signal. **B). Table of color changes correlate with positivity.**
